# Supplementary material for: Dysprosium-doped zinc tungstate nanospheres as highly efficient heterogeneous catalysts in green oxidation of terpenic alcohols with hydrogen peroxide
Source: Royal Society of Chemistry journal article supplement (doi:10.1039/d0nj05623e), 2021-01-01
Supplement: d0nj05623e1.pdf [file d0nj05623e1.pdf]

## Dysprosium-doped zinc tungstate nanospheres as highly efficient heterogeneous catalysts in green oxidation of terpenic alcohols with hydrogen peroxide

Daniel Carreira Batalha,<sup>a</sup> Kellen Cristina Mesquita Borges,<sup>b</sup> Rosana de Fátima Gonçalves,<sup>b</sup> Murillo Henrique de Matos Rodrigues,<sup>b</sup> Mário Júnior Godinho,<sup>b</sup> Humberto Vieira Fajardo<sup>c</sup> and Márcio José da Silva\*<sup>a</sup>

<sup>a</sup> Chemistry Department, Federal University of Viçosa, Viçosa, Minas Gerais, CEP 36570-900, Brazil.

<sup>b</sup> Chemistry Institute, Federal University of Catalão, Catalão, Goiás, CEP 75.704-020, Brazil.

<sup>c</sup> Chemistry Department, Federal University of Ouro Preto, Ouro Preto, CEP 35400-000, Minas Gerais, Brazil.

### SUPPLEMENTAL MATERIAL

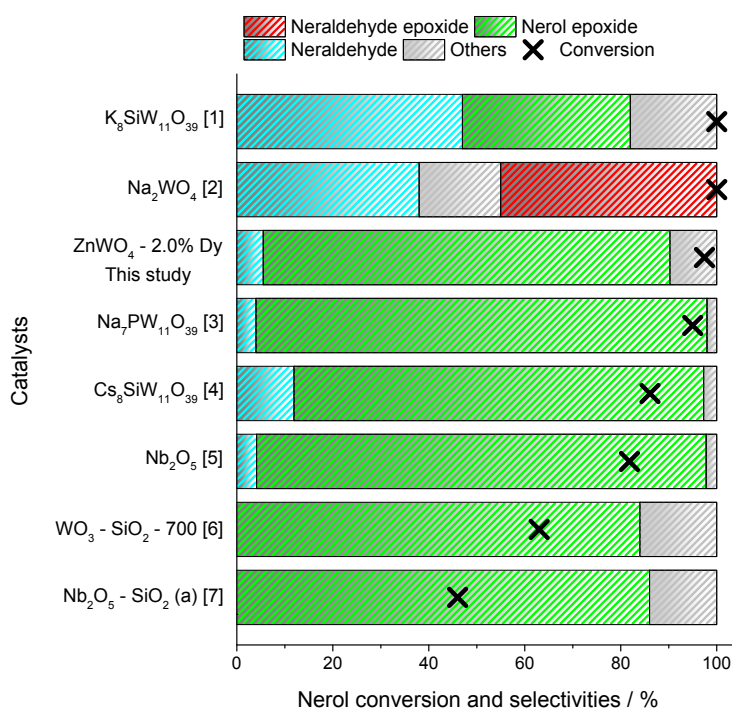

Ref. 1 - Nerol:H<sub>2</sub>O<sub>2</sub> (1:3); Catalyst (1.3 mol %); solvent DMA; 3 h; 363 K  
Ref. 2 - Nerol:H<sub>2</sub>O<sub>2</sub> (1:2); Catalyst (1.3 mol %); solvent DMA; 4 h; 363 K  
This study - Nerol:H<sub>2</sub>O<sub>2</sub> (1:2); Catalyst (3.5 mol %); solvent ACN; 8 h; 333 K  
Ref. 3 - Nerol:H<sub>2</sub>O<sub>2</sub> (1:1); Catalyst (0.3 mol %); solvent ACN; 4 h; 298 K  
Ref. 4 - Nerol:H<sub>2</sub>O<sub>2</sub> (1:2); Catalyst (4.0 mol %); solvent ACN; 8 h; 333 K  
Ref. 5 - Nerol:H<sub>2</sub>O<sub>2</sub> (1:2); Catalyst (4.0 mol %); solvent ACN; 8 h; 333 K  
Ref. 6 - Nerol:H<sub>2</sub>O<sub>2</sub> (1:1); Catalyst (3.4 mol %); solvent - ACN; 2 h; 343 K  
Ref. 7 - Nerol:H<sub>2</sub>O<sub>2</sub> (1:2); Catalyst (4.6 mol %); solvent MeOH; 5 h; 343 K

**Fig SM1.** Comparison of conversion and selectivity of nerol oxidation with hydrogen peroxide over different solid catalysts

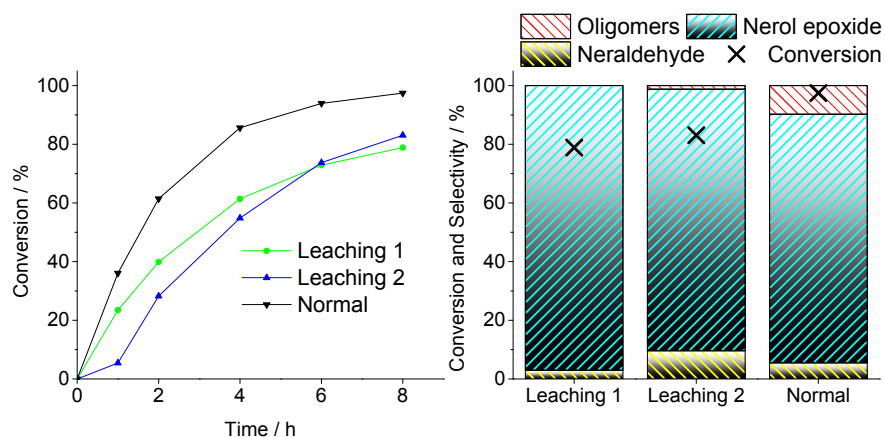

**Fig. SM2** Conversion and selectivity of nerol oxidation reactions with  $H_2O_2$  in the presence of  $ZnWO_4 - 2.0\% Dy$  catalyst<sup>a</sup>

<sup>a</sup>Reaction conditions: nerol (1.375 mmol),  $H_2O_2$  (2.750 mmol), temperature (333 K), catalyst (15 mg),  $CH_3CN$  (10 mL), time (8 h)

*Leaching 1:* Stirring 30 min (catalyst + solvent); after that, the catalyst was removed by centrifugation and the substrate and hydrogen peroxide were placed in the reaction medium; the reaction was followed for 8 h with aliquots periodically collected.

*Leaching 2:* all components were placed in the reaction medium for 30 min under stirring; after this time, the catalyst was removed by centrifugation and the reaction proceeded normally until 8 h was completed.

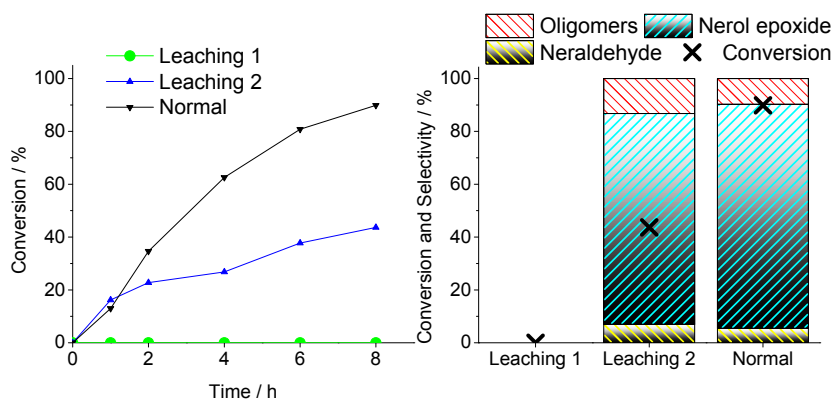

**Fig. SM3** Conversion and selectivity of nerol oxidation reactions with  $H_2O_2$  in the presence of  $ZnWO_4$  catalyst<sup>a</sup>

<sup>a</sup>Reaction conditions: nerol (1.375 mmol),  $H_2O_2$  (2.750 mmol), temperature (333 K), catalyst (15 mg),  $CH_3CN$  (10 mL), time (8 h)

*Leaching 1:* Stirring 30 min (catalyst + solvent); after that, the catalyst was removed by centrifugation and the substrate and hydrogen peroxide were placed in the reaction medium; the reaction was followed for 8 h with aliquots periodically collected.

*Leaching 2:* all components were placed in the reaction medium for 30 min under stirring; after this time, the catalyst was removed by centrifugation and the reaction proceeded normally until 8 h was completed.

## NEROL PRODUCTS

### Nerol epoxide

EIMS 70 eV,  $m/z$  (rel. int. %): 170 [M]<sup>+</sup> (1), 152 (1), 137 (1), 109 (67), 95 (27), 82 (40), 69 (65), 67 (68), 55 (35), 43 (89), 41 (100).

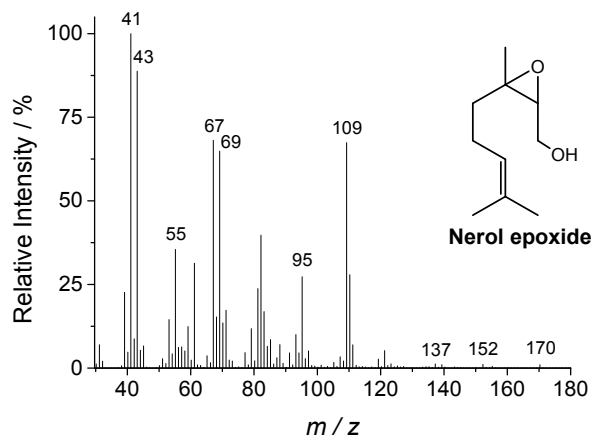

Fig. SM2 Mass spectrum of nerol epoxide<sup>1</sup>

### Neraldehyde

EIMS 70 eV,  $m/z$  (rel. int. %): 152 [M]<sup>+</sup> (1), 94 (27), 84 (24), 69 (80), 53 (14), 41 (100), 39 (23).

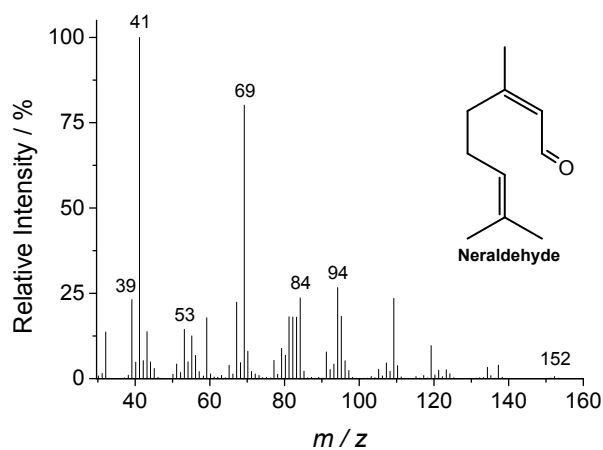

Fig. SM3 Mass spectrum of neraldehyde<sup>2,3</sup>

## BORNEOL PRODUCT

### Camphor

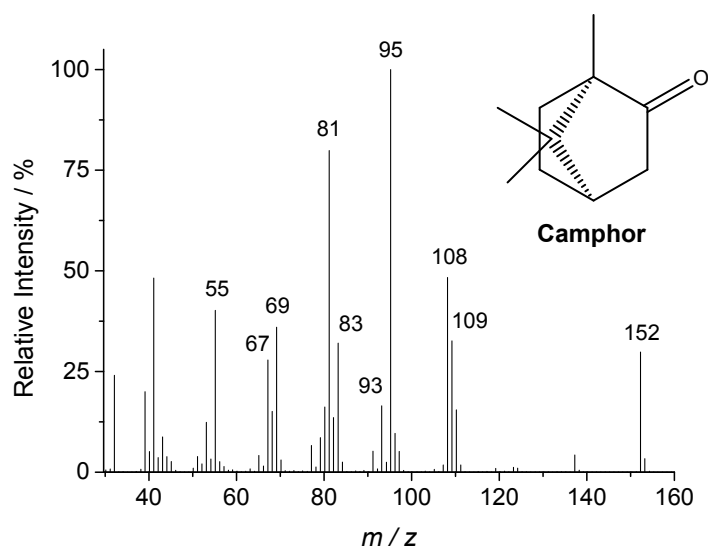

Fig. SM4 Mass spectrum of camphor<sup>4</sup>

## GERANIOL PRODUCTS

### Geraniol diepoxide

EIMS 70 eV,  $m/z$  (rel. int. %): 186 [ $M$ ]<sup>+</sup> (1), 155 (1), 125 (9), 111 (10), 93 (7), 84 (29), 71 (30), 59 (22), 43 (100).

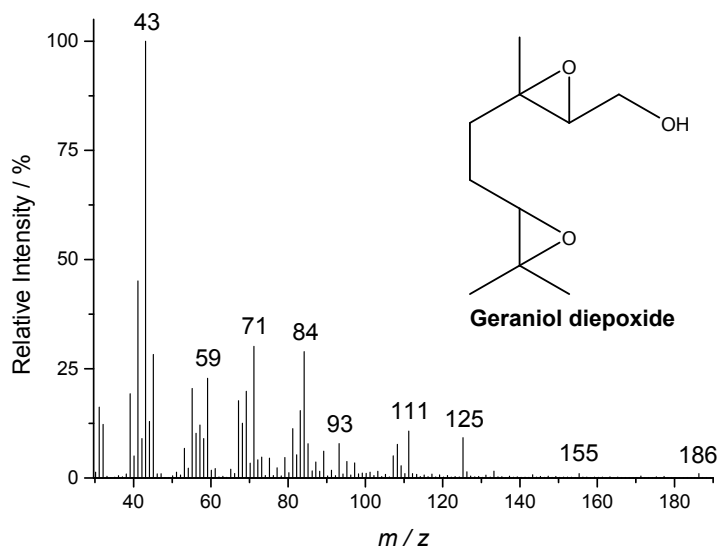

Fig. SM5 Mass spectrum of geraniol diepoxide<sup>1</sup>

### Geraniol epoxide

EIMS 70 eV,  $m/z$  (rel. int. %): 152 [ $M-H_2O$ ]<sup>+</sup> (0.7), 137 (1), 109 (57), 97 (5), 85 (7), 81 (24), 71 (18), 67 (65), 59 (11), 57 (6), 55 (40), 43 (90), 41 (100).

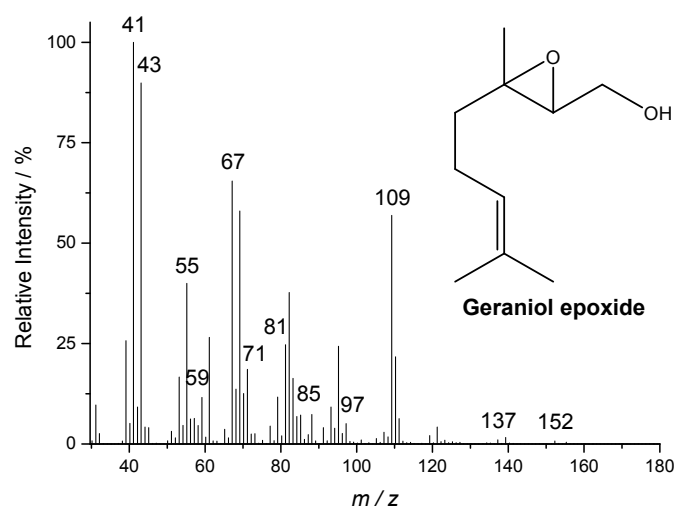

Fig. SM6 Mass spectrum of geraniol epoxide<sup>1</sup>

### Geranaldehyde

EIMS 70 eV,  $m/z$  (rel. int. %): 152 [ $M$ ]<sup>+</sup> (3), 137 (7), 94 (13), 84 (24), 69 (94), 41 (100).

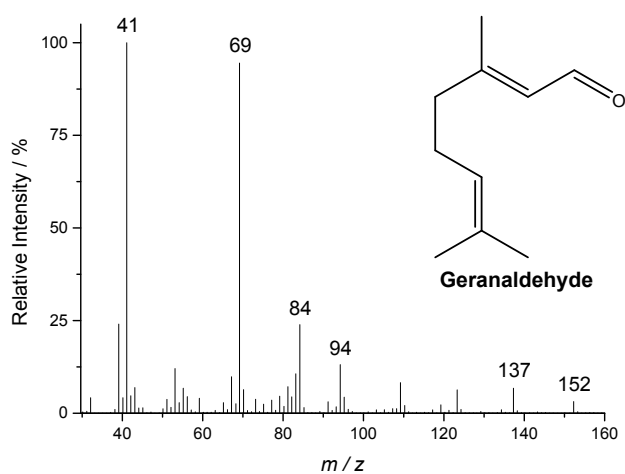

Fig. SM7 Mass spectrum of geranaldehyde<sup>3</sup>

## $\alpha$ -TERPINEOL PRODUCTS

### p-menthan-2-ol, 1,8-epoxy

EIMS 70 eV,  $m/z$  (rel. int. %): 170 [ $M$ ]<sup>+</sup> (10), 126 (50), 108 (79), 71 (56), 43 (100), 41 (33).

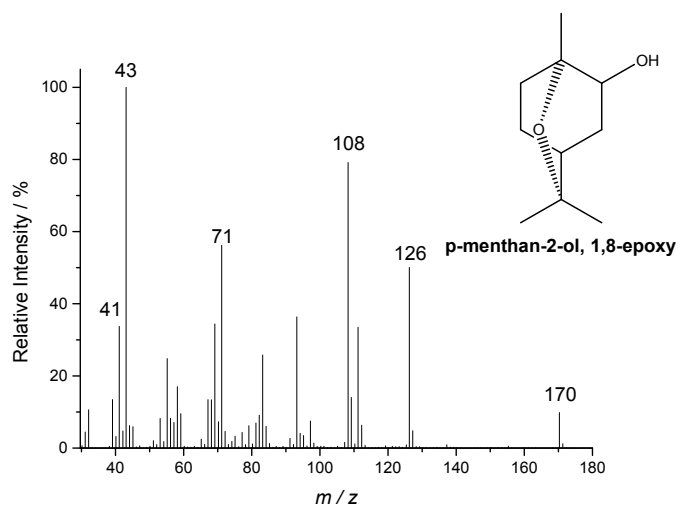

**Fig. SM8** Mass spectrum of p-menthan-2-ol, 1,8-epoxy<sup>5</sup>

---

#### $\alpha$ -Terpineol epoxide

EIMS 70 eV,  $m/z$  (rel. int. %): 170 [ $M$ ]<sup>+</sup> (0.1), 71 (69), 59 (60), 43 (100), 41 (26).

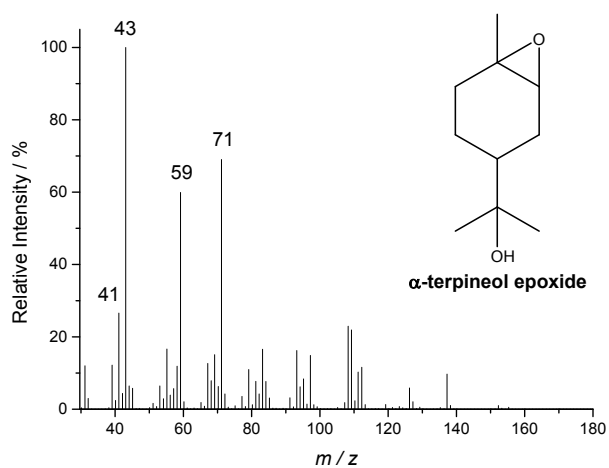

**Fig. SM9** Mass spectrum of  $\alpha$ -terpineol epoxide<sup>5</sup>

---

References used in Fig.SM1.

1. Silva M J, Andrade P H S, Ferreira S O, Vilanculo C B, Oliveira C M O (2018) Monolacunary  $K_8SiW_{11}O_{39}$ -Catalyzed Terpenic Alcohols Oxidation with Hydrogen Peroxide. *Catal Lett* 148:2516-2434
2. Viana L A S, Silva G R N, Silva M J (2018) A Highly Selective  $Na_2WO_4$ -Catalyzed of Terpenic Alcohols by Hydrogen Peroxide. *Catal Lett* 148:374-386
3. Vilanculo C B, Silva M J (2020) Unraveling the role of the lacunar  $Na_7PW_{11}O_{39}$  catalyst in the oxidation of terpene alcohols with hydrogen peroxide at room temperature. *New J Chem* 44:2813-2820
4. Batalha D C, Ferreira S O, Silva R C, Silva M J (2020) Cesium-Exchanged Lacunar Keggin Heteropolyacid Salts: Efficient Solid Catalyst for the Green Oxidation of Terpenics Alcohols with Hydrogen Peroxide. *ChemSelect* 5:1976:1986
5. Batalha D C, Marins N H, Silva R C, Carreño N L V, Farjado H V, Silva M J (2020) Oxidation of terpenic alcohols with hydrogen peroxide promoted by  $Nb_2O_5$  obtained by microwave-assisted hydrothermal method. *Mol Catal* 489:110941:110952
6. Somma, F., & Strukul, G. (2004). Oxidation of geraniol and other substituted olefins with hydrogen peroxide using mesoporous, sol-gel-made tungsten oxide-silica mixed oxide catalysts. *J. Catal.*, 227(2):344.
7. Somma, F., Canton, P., & Strukul, G. (2005). Effect of the matrix in niobium-based aerogel catalysts for the selective oxidation of olefins with hydrogen peroxide. *J. Catal.*, 229(2): 490.
